# Supplementary material for: Microcapillary-assisted dielectrophoresis for single-particle positioning
Source: Royal Society of Chemistry journal article supplement (doi:10.1039/c2lc40150a), 2012-01-01
Supplement: c2lc40150a.pdf [file c2lc40150a.pdf]

Supplementary Information:

Microcapillary-assisted dielectrophoresis ( $\mu\text{C-DEP}$ ) for single-particle positioning

Yuan Luo,<sup>1</sup> Xu Cao,<sup>2</sup> Pingbo Huang,<sup>2,3,4</sup> and Levent Yobas\*<sup>1,3</sup>

<sup>1</sup>Department of Electronic and Computer Engineering,

<sup>2</sup>Division of Life Science,

<sup>3</sup>Division of Biomedical Engineering,

<sup>4</sup>State Key Laboratory of Molecular Neuroscience,

Hong Kong University of Science and Technology,

Clear Water Bay, Hong Kong SAR, China

\*Corresponding Author: eelyobas@ust.hk

**Figure S1:** Average number of beads trapped per microcapillary for various conductivity values of the bead medium and the electrode medium (figure legend). The excitation waveform was at 71V-rms, 500kHz. Each column height and the respective error bar indicate the mean and  $\pm$  one standard deviation of seven to ten repeat measurements.

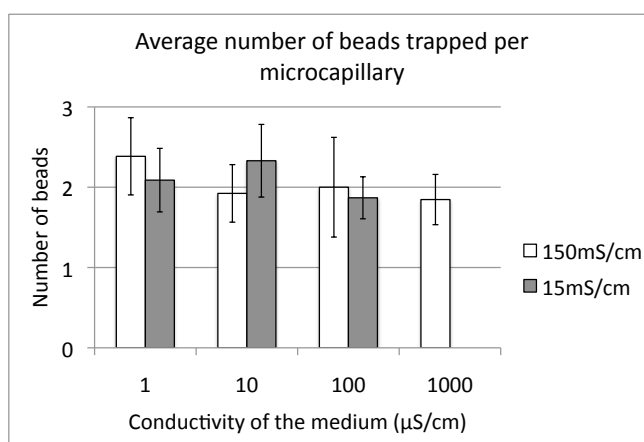

Figure S1

**Video I:** Two beads in a row flowing through the sample microchannel at a speed of 0.5mm/s where the second bead was selectively captured at one of the microcapillaries by

## 2 Supplementary: Microcapillary-assisted dielectrophoresis ( $\mu\text{C-DEP}$ )...

---

turning the activation voltage on as soon as the first bead cleared off the trapping region (excitation: 22.4V-rms at 500kHz).

**Video II:** Individual CHO cells flowing through the sample microchannel at a speed of 200 $\mu\text{m/s}$  were captured at the either microcapillary after the activation voltage was turned on (excitation: 71V-rms, 500kHz).

**Video III:** Individual CHO cells already captured at the microcapillaries through pDEP shown forming pearl chains with the passing by cells under dipole interactions (excitation: 71V-rms, 500kHz).
